# Supplementary material for: Long Noncoding RNA TALAM1 Is a Transcriptional Target of the RUNX2 Transcription Factor in Lung Adenocarcinoma
Source: MDPI journal article supplement (doi:10.3390/cimb45090447), 2023-08-24
Supplement: s1 [file s1]

**Table S1.** Primer sequence of qPCR and ChIP assays.

| <b>qPCR primers</b> |                                                          |                          |
|---------------------|----------------------------------------------------------|--------------------------|
| <b>Gene</b>         | <b>Primer Sequence (F, Forward; R, Reverse)</b>          | <b>Product Size (bp)</b> |
| <i>TALAM1</i>       | F: GGGTGAAGCAGCACAACCA<br>R: TGATCTCTGCAAACCTGCAACCT     | 59                       |
| <i>RUNX2</i>        | F: GCCTTCAAGGTGGTAGCCC<br>R: CGTTACCCGCCATGACAGTA        | 67                       |
| <i>U6</i>           | F: CTCGCTTCGGCAGCACA<br>R: AACGCTTCACGAATTTGCGT          | 94                       |
| <b>ChIP-Primers</b> |                                                          |                          |
| <i>TALAM1</i>       | F: TGTTTTTCCAAAGCAGAAGGTTCT<br>R: GCCCCCAATTCCTACTCGTACT | 80                       |

**Table S2.** Enrichment results for ChIP-seq.

| <b>Start</b> | <b>End</b> | <b>GeneType</b> | <b>TSS</b> | <b>TSS Gene</b> |
|--------------|------------|-----------------|------------|-----------------|
| 50556118     | 50556320   | Intergenic      | -1286781   | DCUN1D4         |
| 90291948     | 90292157   | Intergenic      | -654145    | LOC101927050    |
| 78437747     | 78438041   | Intergenic      | -444167    | LINC01029       |
| 189233360    | 189233682  | Intergenic      | -426085    | LINC01262       |
| 189233822    | 189234165  | Intergenic      | -425613    | LINC01262       |
| 189234865    | 189235429  | Intergenic      | -424459    | LINC01262       |
| 14569876     | 14570095   | Intergenic      | -284531    | LINC01108       |
| 34205391     | 34205607   | Intergenic      | -254425    | EGLN3           |
| 21972884     | 21973269   | Intergenic      | -229919    | UBBP4           |
| 21976302     | 21976632   | Intergenic      | -226528    | UBBP4           |
| 34594646     | 34595845   | Intergenic      | -213765    |                 |
| 34592655     | 34593733   | Intergenic      | -211714    |                 |
| 34588990     | 34589194   | Intergenic      | -207612    |                 |
| 34587787     | 34588410   | Intergenic      | -206618    |                 |
| 34586351     | 34587185   | Intergenic      | -205288    |                 |

|           |           |            |         |              |
|-----------|-----------|------------|---------|--------------|
| 89840168  | 89840501  | Intergenic | -202427 | LOC101927050 |
| 34582646  | 34583974  | Intergenic | -201830 |              |
| 89839535  | 89839829  | Intergenic | -201775 | LOC101927050 |
| 34581872  | 34582466  | Intergenic | -200689 |              |
| 34581102  | 34581802  | Intergenic | -199972 |              |
| 31058037  | 31058227  | Intergenic | -199532 | DEFB115      |
| 89836340  | 89836686  | Intergenic | -198606 | LOC101927050 |
| 31059783  | 31060024  | Intergenic | -197761 | DEFB115      |
| 11701724  | 11701936  | Intergenic | -195576 | LOC102723769 |
| 89833131  | 89833458  | Intergenic | -195387 | LOC101927050 |
| 34575966  | 34576731  | Intergenic | -194868 |              |
| 11702667  | 11702856  | Intergenic | -194645 | LOC102723769 |
| 34575725  | 34575914  | Intergenic | -194339 |              |
| 34573902  | 34574315  | Intergenic | -192628 |              |
| 31064959  | 31065151  | Intergenic | -192609 | DEFB115      |
| 34572529  | 34572848  | Intergenic | -191208 |              |
| 114874576 | 114874765 | Intergenic | -190495 | TBX3         |
| 93641434  | 93641635  | intron     | -187219 | ATOH1        |
| 31075276  | 31075599  | Intergenic | -182227 | DEFB115      |
| 8809812   | 8810084   | Intergenic | -177051 | MIR3648-2    |
| 8810145   | 8810385   | Intergenic | -176734 | MIR3648-2    |
| 8811050   | 8811423   | Intergenic | -175763 | MIR3648-2    |
| 7258613   | 7258804   | Intergenic | -171929 | LOC102724219 |
| 86745782  | 86745971  | Intergenic | -159902 | LINC01148    |
| 79707034  | 79707223  | Intergenic | -120343 | PCAT4        |
| 115726696 | 115727197 | Intergenic | -114018 |              |
| 115729652 | 115729845 | Intergenic | -111216 |              |
| 115731035 | 115731261 | Intergenic | -109816 |              |

|           |           |            |         |              |
|-----------|-----------|------------|---------|--------------|
| 992790    | 993087    | intron     | -109712 |              |
| 157747531 | 157747793 | intron     | -106923 | LOC100506585 |
| 31158559  | 31158751  | Intergenic | -99009  | DEFB115      |
| 1399631   | 1399820   | intron     | -97118  | LOC286083    |
| 7926115   | 7926395   | Intergenic | -96623  | KCNE1B       |
| 527586    | 528208    | Intergenic | -96447  | SHOX         |
| 133827550 | 133827848 | intron     | -87744  | SARDH        |
| 128604234 | 128604447 | Intergenic | -83741  | PTPRK        |
| 58816244  | 58816437  | Intergenic | -82024  | GOT2         |
| 11815380  | 11815712  | Intergenic | -81860  | LOC102723769 |
| 9922      | 11868     | Intergenic | -81273  | PLEKHG4B     |
| 11819864  | 11820241  | Intergenic | -77354  | LOC102723769 |
| 11820803  | 11820992  | Intergenic | -76509  | LOC102723769 |
| 31185399  | 31185627  | Intergenic | -72151  | DEFB115      |
| 9815453   | 9815819   | intron     | -70337  | TXNDC2       |
| 131376799 | 131377256 | Intergenic | -65306  | TCERG1L      |
| 67905201  | 67905422  | Intergenic | -65266  | RNU6-8       |
| 133689493 | 133689792 | Intergenic | -62847  | FRG2B        |
| 134928538 | 134928727 | Intergenic | -56720  | LOC100507548 |
| 161450976 | 161451175 | Intergenic | -54382  | FCGR2A       |
| 190122744 | 190123163 | Intergenic | -50821  | DUX4         |
| 87162774  | 87163191  | Intergenic | -49133  | LOC101928708 |
| 125643844 | 125644033 | Intergenic | -48441  | OSBPL11      |
| 2679150   | 2679356   | intron     | -46237  | MMEL1        |
| 228556661 | 228557016 | Intergenic | -44550  | BTNL10       |
| 99928032  | 99928238  | intron     | -43287  | EVL          |
| 161465766 | 161465960 | Intergenic | -39594  | FCGR2A       |
| 120872505 | 120872821 | Intergenic | -35542  |              |

|           |           |            |        |                 |
|-----------|-----------|------------|--------|-----------------|
| 2668087   | 2668292   | intron     | -35173 | MMEL1           |
| 132820539 | 132820821 | intron     | -34533 | NKX6-2          |
| 15580964  | 15581222  | Intergenic | -34125 | CYP4F8          |
| 234649239 | 234649428 | Intergenic | -33335 | LINC01173       |
| 132242216 | 132242765 | intron     | -32901 | LOC100130238    |
| 114006801 | 114006990 | intron     | -32819 |                 |
| 236097188 | 236097437 | Intergenic | -32222 | NID1            |
| 89009077  | 89009330  | Intergenic | -31996 | CBFA2T3         |
| 177703906 | 177704210 | Intergenic | -31781 | LOC202181       |
| 133264899 | 133265400 | Intergenic | -29313 | ANHX            |
| 2661539   | 2661820   | intron     | -28663 | MMEL1           |
| 157600163 | 157600352 | intron     | -25835 | MIR153-2        |
| 1285043   | 1285232   | Intergenic | -24015 | UBE2I           |
| 2656367   | 2656642   | intron     | -23488 | MMEL1           |
| 132393894 | 132394101 | Intergenic | -22808 | GPR39           |
| 110495720 | 110495909 | Intergenic | -22739 | LIMS3-LOC440895 |
| 132394286 | 132394750 | Intergenic | -22287 | GPR39           |
| 128340953 | 128341200 | Intergenic | -22208 | HS6ST1          |
| 79257320  | 79257550  | intron     | -21945 | NRXN3           |
| 2522661   | 2523122   | Intergenic | -21429 | LOC105376351    |
| 36289889  | 36290113  | Intergenic | -21342 | LOC100134317    |
| 117043    | 117233    | Intergenic | -20433 | SCGB1C2         |
| 114354050 | 114354423 | Intergenic | -20288 | LINC01054       |
| 43496381  | 43496597  | intron     | -19765 | EFCAB6-AS1      |
| 38088095  | 38088289  | intron     | -19558 | TBC1D3C         |
| 173688575 | 173688824 | Intergenic | -18848 | ANKRD45         |
| 97714552  | 97714741  | intron     | -17237 |                 |
| 8415162   | 8415658   | Intergenic | -17120 | MIR6724-4       |

|           |           |            |        |              |
|-----------|-----------|------------|--------|--------------|
| 34143643  | 34143832  | Intergenic | -17039 | DCAF12       |
| 8232606   | 8233093   | intron     | -16656 | MIR6724-4    |
| 8415865   | 8416999   | Intergenic | -16098 | MIR6724-4    |
| 8233151   | 8233832   | intron     | -16014 | MIR6724-4    |
| 83022687  | 83023184  | intron     | -15938 | B3GNTL1      |
| 31241537  | 31241919  | Intergenic | -15936 | DEFB115      |
| 122584062 | 122584318 | Intergenic | -15546 | LOC105375734 |
| 80262823  | 80263274  | Intergenic | -15534 | PARD6G       |
| 4005689   | 4005878   | Intergenic | -15517 |              |
| 83022355  | 83022544  | intron     | -15452 | B3GNTL1      |
| 8233927   | 8234437   | intron     | -15323 | MIR6724-4    |
| 8417121   | 8417381   | Intergenic | -15279 | MIR6724-4    |
| 8417487   | 8417811   | Intergenic | -14881 | MIR6724-4    |
| 69068414  | 69068608  | intron     | -14665 | MIR3164      |
| 8234718   | 8235545   | intron     | -14374 | MIR6724-4    |
| 36297431  | 36297662  | Intergenic | -13797 | LOC100134317 |
| 37282561  | 37282890  | Intergenic | -13715 | LOC284412    |
| 240984764 | 240985239 | intron     | -13617 | SNED1        |
| 69069418  | 69069763  | intron     | -13586 | MIR3164      |
| 240985306 | 240985598 | intron     | -13166 | SNED1        |
| 60538920  | 60539110  | Intergenic | -12773 | APPBP2       |
| 8419455   | 8420236   | Intergenic | -12685 | MIR6724-4    |
| 8237075   | 8237837   | intron     | -12049 | MIR6724-4    |
| 8420404   | 8420860   | Intergenic | -11898 | MIR6724-4    |
| 172947186 | 172947376 | intron     | -11448 | RPL26L1      |
| 37301337  | 37301541  | Intergenic | -11398 | HKR1         |
| 36299662  | 36300280  | Intergenic | -11372 | LOC100134317 |
| 22534724  | 22535076  | exon       | -10798 | LOC653786    |

|           |           |            |        |              |
|-----------|-----------|------------|--------|--------------|
| 32916097  | 32916631  | intron     | -10763 | LOC100271832 |
| 71199502  | 71199693  | intron     | -10538 | THSD4-AS1    |
| 8239181   | 8239376   | intron     | -10227 | MIR6724-4    |
| 159176699 | 159176888 | intron     | -10042 | MIR6888      |
| 93046088  | 93046277  | intron     | -9208  |              |
| 16880045  | 16880268  | 3'UTR      | -8843  | F2RL3        |
| 8424120   | 8424350   | Intergenic | -8295  | MIR6724-4    |
| 8242613   | 8242894   | intron     | -6752  | MIR6724-4    |
| 228637747 | 228638065 | Intergenic | -6741  | RHOU         |
| 24622106  | 24622295  | Intergenic | -5982  | LINC01915    |
| 228638819 | 228639008 | Intergenic | -5734  | RHOU         |
| 74487584  | 74487826  | Intergenic | -5680  | LOC100287896 |
| 228635518 | 228635997 | Intergenic | -5249  | RNA5S16      |
| 192988    | 193328    | Intergenic | -5200  | MIR6859-3    |
| 25883251  | 25883440  | Intergenic | -4858  | ASXL2        |
| 37273462  | 37273741  | Intergenic | -4591  | LOC284412    |
| 228639925 | 228640416 | Intergenic | -4477  | RHOU         |
| 153426433 | 153426636 | Intergenic | -3951  | S100A8       |
| 36307541  | 36307730  | Intergenic | -3708  | LOC100134317 |
| 498657    | 498913    | Intergenic | -3340  | LOC100132287 |
| 51121640  | 51121829  | Intergenic | -3146  | SIGLEC9      |
| 8429294   | 8429587   | Intergenic | -3090  | MIR6724-4    |
| 228633264 | 228633534 | Intergenic | -2891  | RNA5S16      |
| 1738919   | 1740972   | Intergenic | -2891  | SERPINF2     |
| 6911585   | 6911815   | intron     | -2880  | ENO2         |
| 73055707  | 73055929  | Intergenic | -2716  | RBM25        |
| 181045916 | 181046231 | intron     | -2589  | MIR8089      |
| 8429852   | 8430078   | Intergenic | -2565  | MIR6724-4    |

|           |           |              |       |            |
|-----------|-----------|--------------|-------|------------|
| 1076635   | 1076884   | Intergenic   | -2453 | RNF223     |
| 8385804   | 8386044   | intron       | -2438 | MIR6724-3  |
| 8202747   | 8203031   | intron       | -2426 | MIR6724-1  |
| 156030332 | 156030796 | Intergenic   | -2381 | DDX11L16   |
| 228642230 | 228642663 | Intergenic   | -2201 | RHOU       |
| 8386104   | 8386298   | intron       | -2161 | MIR6724-3  |
| 126672365 | 126672862 | Intergenic   | -2103 |            |
| 8430203   | 8430842   | Intergenic   | -2008 | MIR6724-4  |
| 101980919 | 101981266 | Intergenic   | -1999 | DDX11L9    |
| 8247202   | 8247833   | intron       | -1988 | MIR6724-4  |
| 8203362   | 8203681   | intron       | -1794 | MIR6724-1  |
| 10019     | 10369     | Intergenic   | -1680 | DDX11L1    |
| 24336615  | 24336804  | intron       | -1638 | ADCY4      |
| 9917      | 10135     | Intergenic   | -1534 |            |
| 322288    | 322492    | Intergenic   | -1530 | IFITM3     |
| 633833    | 634330    | Intergenic   | -1396 |            |
| 48428099  | 48428465  | intron       | -1374 | LPAR6      |
| 8386887   | 8387098   | intron       | -1370 | MIR6724-3  |
| 10231     | 10639     | Intergenic   | -1316 | LINC01986  |
| 71449633  | 71449822  | Intergenic   | -1296 | DHCR7      |
| 1741385   | 1741706   | Intergenic   | -1291 | SERPINF2   |
| 132551317 | 132551527 | Intergenic   | -1262 | TAAR8      |
| 43677586  | 43677775  | intron       | -1251 | C1GALT1C1L |
| 8438496   | 8438685   | non-coding   | -1232 |            |
| 100411304 | 100411493 | Intergenic   | -1125 | PCDH19     |
| 10028     | 10393     | promoter-TSS | -997  | LINC02564  |
| 321397    | 322184    | promoter-TSS | -930  | IFITM3     |
| 1661075   | 1661429   | promoter-TSS | -872  | MIR3649    |

|           |           |              |      |              |
|-----------|-----------|--------------|------|--------------|
| 228628788 | 228629294 | promoter-TSS | -775 | RNA5S9       |
| 2         | 16569     | promoter-TSS | -771 | MIR12136     |
| 228613142 | 228613654 | promoter-TSS | -771 | RNA5S12      |
| 629525    | 630011    | promoter-TSS | -759 | LOC101928626 |
| 228622079 | 228622570 | promoter-TSS | -759 | RNA5S5       |
| 228631023 | 228631496 | promoter-TSS | -751 | RNA5S16      |
| 228624275 | 228624794 | promoter-TSS | -749 | RNA5S11      |
| 228610850 | 228611395 | promoter-TSS | -736 | RNA5S2       |
| 108239    | 108431    | promoter-TSS | -730 | ROCK1P1      |
| 228617631 | 228617945 | promoter-TSS | -679 | RNA5S14      |
| 228615335 | 228615719 | promoter-TSS | -659 | RNA5S17      |
| 228619814 | 228620181 | promoter-TSS | -647 | RNA5S6       |
| 228626541 | 228626760 | promoter-TSS | -623 | RNA5S17      |
| 228646679 | 228646870 | promoter-TSS | -616 | RNA5S3       |
| 65507341  | 65508252  | promoter-TSS | -364 | TALAM1       |
| 25279007  | 25279196  | promoter-TSS | -273 | CARMIL1      |
| 10307843  | 10308257  | promoter-TSS | -263 | CAND1.11     |
| 629137    | 629342    | promoter-TSS | -230 | LOC101928626 |
| 632742    | 632944    | promoter-TSS | -158 | MIR12136     |
| 44928749  | 44929069  | promoter-TSS | -94  | ITGB2        |
| 124839575 | 124839938 | promoter-TSS | -85  | SCARB1       |
| 15510994  | 15511214  | promoter-TSS | -85  | PSIP1        |
| 228644435 | 228644753 | promoter-TSS | -53  | RHOU         |
| 16646037  | 16646226  | promoter-TSS | -3   | BZW2         |
| 30742319  | 30742970  | promoter-TSS | 43   | FLOT1        |
| 49541828  | 49542017  | intron       | 189  | GAGE12H      |
| 36992808  | 36993047  | promoter-TSS | 204  | EPM2AIP1     |
| 31827858  | 31828060  | exon         | 221  | HSPA1B       |

|           |           |            |      |          |
|-----------|-----------|------------|------|----------|
| 110226231 | 110226420 | intron     | 329  | MXI1     |
| 85827350  | 85827579  | non-coding | 478  | REXO1L2P |
| 85736690  | 85736903  | non-coding | 498  | REXO1L2P |
| 85661909  | 85662105  | non-coding | 506  | REXO1L2P |
| 85790736  | 85790960  | non-coding | 520  | REXO1L2P |
| 228623142 | 228623340 | TTS        | 544  | RNA5S14  |
| 136355208 | 136355483 | intron     | 563  | GPSM1    |
| 631885    | 632360    | TTS        | 563  |          |
| 85744815  | 85745113  | non-coding | 568  | REXO1L2P |
| 228609633 | 228609926 | TTS        | 607  | RNA5S1   |
| 99805844  | 99806066  | intron     | 972  | DNM1P46  |
| 9221379   | 9221587   | exon       | 1331 | USP17L21 |
| 132674047 | 132674247 | intron     | 1398 | LRRC6    |
| 77269786  | 77269980  | intron     | 1429 | NGB      |
| 1114504   | 1115034   | intron     | 1506 | PSMF1    |
| 630910    | 631434    | Intergenic | 1513 |          |
| 228608667 | 228608926 | Intergenic | 1590 | RNA5S1   |
| 137734224 | 137734423 | intron     | 1766 | KLHL3    |
| 8215655   | 8215879   | non-coding | 1879 | RNA28S5  |
| 15932718  | 15932947  | intron     | 2034 | CYP4F11  |
| 168499184 | 168499375 | intron     | 2227 | PALLD    |
| 48967164  | 48968490  | TTS        | 2518 | FTL      |
| 248408188 | 248408906 | Intergenic | 2552 | OR2T1    |
| 59843872  | 59844061  | Intergenic | 2700 | MIR21    |
| 115843559 | 115843864 | intron     | 2747 |          |
| 47021040  | 47021229  | intron     | 2793 | ELOA3B   |
| 154189106 | 154189309 | intron     | 2893 |          |
| 8684870   | 8685329   | TTS        | 3043 | ID2      |

|           |           |            |      |              |
|-----------|-----------|------------|------|--------------|
| 77252787  | 77253042  | intron     | 3066 | GALR1        |
| 74967980  | 74968202  | intron     | 3386 | GATSL2       |
| 143014743 | 143015040 | intron     | 3499 | LOC100133669 |
| 48669332  | 48669521  | intron     | 3655 | NTN5         |
| 161528153 | 161528342 | Intergenic | 3707 | HSPA6        |
| 8217625   | 8217827   | non-coding | 3838 | RNA28S5      |
| 61962950  | 61964371  | TTS        | 3974 | FTH1         |
| 28430420  | 28430628  | intron     | 4033 | MIR4509-2    |
| 74724697  | 74724886  | intron     | 4127 | LOC101926943 |
| 31819589  | 31819806  | Intergenic | 4154 | HSPA1A       |
| 35913414  | 35914103  | Intergenic | 4268 |              |
| 136555138 | 136555354 | intron     | 4368 | MIR934       |
| 15850346  | 15850535  | intron     | 4373 | AP1S2        |
| 8218208   | 8218397   | non-coding | 4414 | RNA28S5      |
| 14513081  | 14513462  | Intergenic | 4591 | DNAJB1       |
| 65427044  | 65427818  | TTS        | 4633 | NEAT1        |
| 669434    | 669642    | intron     | 4738 | ATP5I        |
| 135849653 | 135849842 | intron     | 4791 | CT45A8       |
| 48542206  | 48542501  | intron     | 5034 | LOC284933    |
| 1707181   | 1707370   | intron     | 5044 | SLBP         |
| 47138731  | 47138920  | intron     | 5120 | NETO2        |
| 115845952 | 115846243 | intron     | 5133 |              |
| 898065    | 898521    | intron     | 5409 | TRIP13       |
| 190179479 | 190179668 | intron     | 5799 | DUX4         |
| 8219803   | 8220131   | TTS        | 6079 | RNA28S5      |
| 186120    | 187258    | Intergenic | 6230 | HBQ1         |
| 125234827 | 125235214 | TTS        | 6323 | HSPA5        |
| 2822599   | 2823092   | Intergenic | 6481 | TMEM239      |

|           |           |            |       |           |
|-----------|-----------|------------|-------|-----------|
| 76798209  | 76798398  | TTS        | 6551  | TSKU      |
| 8220435   | 8220664   | intron     | 6661  | RNA28S5   |
| 8403726   | 8404026   | intron     | 6950  |           |
| 125234171 | 125234382 | TTS        | 7067  | HSPA5     |
| 8448565   | 8448804   | Intergenic | 7538  |           |
| 8404352   | 8404585   | intron     | 7542  |           |
| 228389432 | 228389621 | Intergenic | 7583  | MIR6742   |
| 8221384   | 8221638   | intron     | 7623  | RNA28S5   |
| 137846108 | 137846297 | Intergenic | 7783  | MIR602    |
| 45101561  | 45102268  | intron     | 7901  |           |
| 115848813 | 115849146 | intron     | 8015  |           |
| 1398111   | 1398689   | Intergenic | 8042  | NKX1-1    |
| 112776595 | 112776922 | intron     | 8640  | IL1A      |
| 1397501   | 1398058   | Intergenic | 8663  | NKX1-1    |
| 8449858   | 8450107   | Intergenic | 8836  |           |
| 8405705   | 8405939   | intron     | 8896  |           |
| 3653798   | 3654341   | intron     | 8941  | ART1      |
| 8222659   | 8223004   | intron     | 8943  | RNA28S5   |
| 101016269 | 101016458 | intron     | 9421  | DPH5      |
| 81249403  | 81249598  | intron     | 9586  |           |
| 8451434   | 8451737   | Intergenic | 10439 |           |
| 2945866   | 2946166   | intron     | 10470 | NOP14-AS1 |
| 8224343   | 8224532   | non-coding | 10549 | RNA28S5   |
| 173314175 | 173314583 | TTS        | 10649 |           |
| 8407336   | 8407864   | intron     | 10674 |           |
| 216227570 | 216227785 | Intergenic | 10788 | LINC01963 |
| 206172952 | 206173170 | Intergenic | 10833 | SNORA41   |
| 129543    | 129768    | Intergenic | 10911 | LOC729737 |

|           |           |            |       |              |
|-----------|-----------|------------|-------|--------------|
| 66798570  | 66798768  | intron     | 11597 | MIR634       |
| 8408277   | 8408830   | intron     | 11627 |              |
| 8225275   | 8225759   | intron     | 11629 | RNA28S5      |
| 8452441   | 8453294   | Intergenic | 11721 |              |
| 66798828  | 66799504  | intron     | 12094 | MIR634       |
| 24212292  | 24212506  | TTS        | 12159 | LOC284632    |
| 4387893   | 4388082   | intron     | 12560 | SH3GL1       |
| 8409645   | 8409961   | intron     | 12877 |              |
| 8453923   | 8454297   | Intergenic | 12964 |              |
| 8226773   | 8226978   | intron     | 12987 | RNA28S5      |
| 248742478 | 248742674 | intron     | 13183 | LYPD8        |
| 8454600   | 8454843   | Intergenic | 13575 |              |
| 8227361   | 8227633   | non-coding | 13609 | RNA28S5      |
| 8410436   | 8410697   | non-coding | 13640 |              |
| 188152879 | 188153362 | Intergenic | 13679 | TRIML1       |
| 18863753  | 18863942  | Intergenic | 13729 | LOC102725072 |
| 115854773 | 115854998 | intron     | 13921 |              |
| 81818937  | 81819126  | Intergenic | 14260 | MCRIP1       |
| 8455272   | 8455697   | Intergenic | 14338 |              |
| 77618413  | 77618714  | intron     | 14349 | LINGO1       |
| 8228127   | 8228557   | TTS        | 14454 | RNA28S5      |
| 8411075   | 8411838   | TTS        | 14530 |              |
| 138231406 | 138231595 | intron     | 14644 |              |
| 115855545 | 115855836 | intron     | 14726 |              |
| 905446    | 906620    | intron     | 14856 | ADAP1        |
| 8455749   | 8456416   | Intergenic | 14936 |              |
| 188154371 | 188154777 | Intergenic | 15133 | TRIML1       |
| 46357354  | 46357834  | TTS        | 15179 | SLC38A2      |

|           |           |            |       |             |
|-----------|-----------|------------|-------|-------------|
| 8228914   | 8229251   | TTS        | 15194 | RNA28S5     |
| 109758137 | 109758429 | intron     | 15204 | FAM222A-AS1 |
| 115856089 | 115856278 | intron     | 15219 |             |
| 64271069  | 64271359  | intron     | 15466 | PCMTD2      |
| 50758139  | 50758328  | intron     | 15928 | MIR3181     |
| 8412527   | 8413207   | Intergenic | 15941 |             |
| 17601208  | 17601399  | intron     | 16071 | HACD1       |
| 22618641  | 22618830  | Intergenic | 16109 |             |
| 8457023   | 8457672   | Intergenic | 16201 |             |
| 8229935   | 8230339   | intron     | 16249 | RNA28S5     |
| 8413443   | 8413632   | Intergenic | 16611 |             |
| 8230434   | 8230684   | intron     | 16671 | RNA28S5     |
| 8457894   | 8458106   | Intergenic | 16854 |             |
| 115857675 | 115858089 | intron     | 16918 |             |
| 79417195  | 79417445  | intron     | 17021 | NFATC1      |
| 8231179   | 8231404   | intron     | 17403 | RNA28S5     |
| 113314493 | 113314892 | intron     | 17453 | LAMP1       |
| 79417649  | 79417896  | intron     | 17473 | NFATC1      |
| 31431725  | 31432041  | intron     | 18070 | SERINC2     |
| 14634062  | 14634560  | Intergenic | 18071 | SNORD141B   |
| 176591694 | 176592020 | intron     | 18299 | GPRIN1      |
| 37364557  | 37364746  | intron     | 18523 | SRC         |
| 1430287   | 1430528   | intron     | 19255 | BRSK2       |
| 8459732   | 8461936   | Intergenic | 19688 |             |
| 1002802   | 1003577   | intron     | 19837 | MIR339      |
| 134925166 | 134925505 | intron     | 20215 | PCBD2       |
| 1431180   | 1431674   | intron     | 20275 | BRSK2       |
| 8462028   | 8462327   | Intergenic | 21031 |             |

|           |           |            |       |              |
|-----------|-----------|------------|-------|--------------|
| 1432254   | 1432855   | intron     | 21402 | BRSK2        |
| 150465526 | 150466490 | Intergenic | 21687 | RND3         |
| 135939399 | 135939588 | intron     | 21880 | UBAC1        |
| 9883      | 10289     | Intergenic | 21929 | LOC100288778 |
| 1096961   | 1097185   | exon       | 22198 | MUC2         |
| 45500539  | 45501108  | intron     | 22557 | MIR6815      |
| 1097346   | 1097588   | exon       | 22592 | MUC2         |
| 111748331 | 111748520 | Intergenic | 22709 | MIR4771-1    |
| 44181418  | 44182115  | intron     | 22946 | CAPN11       |
| 8464043   | 8464786   | Intergenic | 23268 |              |
| 80147579  | 80147856  | intron     | 23404 | TPD52        |
| 1098485   | 1098833   | exon       | 23784 | MUC2         |
| 8464966   | 8465438   | Intergenic | 24056 |              |
| 1360833   | 1361221   | intron     | 24242 | IL3RA        |
| 50807788  | 50808445  | Intergenic | 24387 | RPL23AP82    |
| 38187718  | 38187909  | intron     | 24717 |              |
| 38232332  | 38232521  | intron     | 24823 | LOC440434    |
| 7874313   | 7874539   | Intergenic | 25229 | LOC101929551 |
| 115866831 | 115867042 | intron     | 25972 |              |
| 664778    | 664992    | intron     | 27616 | DRD4         |
| 100313897 | 100314086 | intron     | 27984 | ADAMTS17     |
| 115869777 | 115870060 | intron     | 28954 |              |
| 598243    | 598490    | Intergenic | 30643 | LOC101928626 |
| 597972    | 598162    | Intergenic | 30942 | LOC101928626 |
| 115872833 | 115873099 | intron     | 32002 |              |
| 58607403  | 58607595  | Intergenic | 32100 | CENPBD1P1    |
| 105215640 | 105215867 | intron     | 32132 | BRF1         |
| 7480157   | 7480370   | Intergenic | 34059 | LOC102723360 |

|           |           |            |       |              |
|-----------|-----------|------------|-------|--------------|
| 121747268 | 121747785 | intron     | 34774 | TMEM120B     |
| 115876328 | 115876634 | intron     | 35517 |              |
| 132573483 | 132574352 | intron     | 36130 | INPP5A       |
| 195775445 | 195775640 | intron     | 36387 | MUC4         |
| 115878558 | 115878916 | intron     | 37773 |              |
| 20939462  | 20939651  | intron     | 38294 |              |
| 103059797 | 103059986 | intron     | 38808 | ATP6V1C1     |
| 10786472  | 10786801  | intron     | 38831 | TMEM14B      |
| 240780972 | 240781418 | intron     | 39024 | KIF1A        |
| 248945838 | 248946472 | Intergenic | 39912 | PGBD2        |
| 545740    | 545963    | intron     | 40635 | LOC105369595 |
| 115881557 | 115881905 | intron     | 40767 |              |
| 79620488  | 79620776  | Intergenic | 41350 |              |
| 115882432 | 115882788 | intron     | 41646 |              |
| 95247130  | 95247319  | exon       | 43779 | PDLIM1       |
| 150910302 | 150910540 | Intergenic | 45383 | KCNH2        |
| 22764875  | 22765064  | intron     | 45452 | MIR4684      |
| 115886775 | 115887072 | intron     | 45959 |              |
| 115887131 | 115887409 | intron     | 46306 |              |
| 163007641 | 163007854 | intron     | 46414 | PACRG-AS2    |
| 131152970 | 131153159 | Intergenic | 48217 | PLEKHB2      |
| 60424149  | 60424338  | Intergenic | 48733 | LOC101928048 |
| 130386804 | 130387015 | Intergenic | 49022 | PIWIL1       |
| 23241051  | 23241243  | intron     | 51999 | PTCHD1-AS    |
| 10744384  | 10744573  | intron     | 52168 | CASZ1        |
| 89371777  | 89371966  | intron     | 53020 | SECISBP2     |
| 43281634  | 43281856  | intron     | 54534 | LINC01126    |
| 145336332 | 145336539 | intron     | 55319 | RNVU1-14     |

|           |           |            |       |              |
|-----------|-----------|------------|-------|--------------|
| 141106572 | 141106861 | intron     | 55369 | SPSB4        |
| 89361644  | 89361833  | intron     | 55495 | FOXN3        |
| 17598578  | 17598897  | Intergenic | 56901 |              |
| 17597790  | 17597979  | Intergenic | 57754 |              |
| 89332     | 89532     | Intergenic | 58727 | LINC00266-3  |
| 11283896  | 11284187  | intron     | 60633 | CELF2-AS1    |
| 3315225   | 3315599   | intron     | 62406 | TSSC1        |
| 23218288  | 23218597  | intron     | 62617 | CABLES1      |
| 129779881 | 129780091 | Intergenic | 63388 | MIR4297      |
| 42304538  | 42304734  | Intergenic | 63409 | LOC441666    |
| 46699746  | 46699944  | Intergenic | 64171 | PRMT2        |
| 93722044  | 93722351  | intron     | 66288 | PRIMA1       |
| 186433780 | 186433982 | intron     | 67177 | F11-AS1      |
| 7488478   | 7488868   | Intergenic | 67412 | LOC100506274 |
| 186433290 | 186433713 | intron     | 67557 | F11-AS1      |
| 7488939   | 7489128   | Intergenic | 67772 | LOC100506274 |
| 186432490 | 186433003 | intron     | 68312 | F11-AS1      |
| 137716262 | 137716478 | intron     | 72036 |              |
| 107027497 | 107027803 | intron     | 75338 | LOC340512    |
| 223065552 | 223065789 | Intergenic | 77578 | TLR5         |
| 166783953 | 166784185 | intron     | 78456 | RPS6KA2      |
| 182834229 | 182834571 | Intergenic | 82853 |              |
| 181450139 | 181450388 | Intergenic | 82976 | OR4F3        |
| 182833692 | 182834035 | Intergenic | 83390 |              |
| 24834806  | 24835094  | intron     | 84466 | MIR6731      |
| 37403689  | 37403878  | Intergenic | 90130 | LINC01605    |
| 25758554  | 25758836  | intron     | 90130 | MIR4715      |
| 25757951  | 25758336  | intron     | 90682 | MIR4715      |

|           |           |            |        |              |
|-----------|-----------|------------|--------|--------------|
| 240184951 | 240185161 | intron     | 93173  | FMN2         |
| 8687019   | 8687209   | Intergenic | 94349  | CPZ          |
| 81877606  | 81877795  | intron     | 98409  | PLCG2        |
| 725155    | 725365    | Intergenic | 100916 | SHOX         |
| 88295204  | 88295399  | Intergenic | 101020 | LOC101928880 |
| 134839423 | 134840334 | Intergenic | 103933 |              |
| 49097669  | 49097859  | Intergenic | 111122 | CWH43        |
| 49098424  | 49098618  | Intergenic | 111879 | CWH43        |
| 42900206  | 42900542  | Intergenic | 111974 | XLOC_007697  |
| 49098680  | 49099042  | Intergenic | 112219 | CWH43        |
| 49102430  | 49102631  | Intergenic | 115888 | CWH43        |
| 49102684  | 49102879  | Intergenic | 116139 | CWH43        |
| 49104347  | 49104592  | Intergenic | 117827 | CWH43        |
| 49108185  | 49108528  | Intergenic | 121714 | CWH43        |
| 79541105  | 79541294  | Intergenic | 121942 | MIR1252      |
| 6194020   | 6194209   | Intergenic | 123500 | WSCD1        |
| 49110550  | 49110927  | Intergenic | 124096 | CWH43        |
| 66827615  | 66827804  | Intergenic | 125473 | SMAD6        |
| 239527454 | 239527735 | Intergenic | 125846 | LOC101928111 |
| 49114578  | 49114772  | Intergenic | 128033 | CWH43        |
| 49117539  | 49117728  | Intergenic | 130991 | CWH43        |
| 10655427  | 10655769  | Intergenic | 134084 | TPTE         |
| 49121000  | 49121239  | Intergenic | 134477 | CWH43        |
| 49123457  | 49123939  | Intergenic | 137056 | CWH43        |
| 91522200  | 91522498  | Intergenic | 137600 | LOC654342    |
| 9881      | 10073     | Intergenic | 139461 | LOC102723672 |
| 49128736  | 49128974  | Intergenic | 142213 | CWH43        |
| 49130725  | 49131031  | Intergenic | 144236 | CWH43        |

|           |           |            |        |           |
|-----------|-----------|------------|--------|-----------|
| 91511501  | 91511690  | Intergenic | 148354 | LOC654342 |
| 49135908  | 49136232  | Intergenic | 149428 | CWH43     |
| 49137051  | 49137431  | Intergenic | 150599 | CWH43     |
| 49140402  | 49140730  | Intergenic | 153924 | CWH43     |
| 143267126 | 143267648 | Intergenic | 155205 | LOC645166 |
| 143266412 | 143267074 | Intergenic | 155849 | LOC645166 |
| 143265400 | 143266063 | Intergenic | 156861 | LOC645166 |
| 49144217  | 49144533  | Intergenic | 157733 | CWH43     |
| 143264356 | 143264950 | Intergenic | 157939 | LOC645166 |
| 49144652  | 49144923  | Intergenic | 158145 | CWH43     |
| 143263200 | 143264196 | Intergenic | 158894 | LOC645166 |
| 143261945 | 143262951 | Intergenic | 160144 | LOC645166 |
| 143260715 | 143260974 | Intergenic | 161748 | LOC645166 |
| 49149448  | 49149941  | Intergenic | 163052 | CWH43     |
| 50650557  | 50650746  | intron     | 163393 | SHROOM4   |
| 143256756 | 143256970 | Intergenic | 165729 | LOC645166 |
| 143256239 | 143256657 | Intergenic | 166144 | LOC645166 |
| 49153064  | 49153489  | Intergenic | 166634 | CWH43     |
| 143255421 | 143256116 | Intergenic | 166824 | LOC645166 |
| 192027565 | 192027754 | intron     | 167274 | TMEFF2    |
| 143254283 | 143255349 | Intergenic | 167776 | LOC645166 |
| 49154483  | 49154673  | Intergenic | 167936 | CWH43     |
| 143253699 | 143254189 | Intergenic | 168648 | LOC645166 |
| 46398246  | 46401678  | Intergenic | 169135 | ANKRD26P1 |
| 143252673 | 143253251 | Intergenic | 169630 | LOC645166 |
| 143251936 | 143252375 | Intergenic | 170437 | LOC645166 |
| 143251437 | 143251830 | Intergenic | 170959 | LOC645166 |
| 10692677  | 10693073  | Intergenic | 171361 | TPTE      |

|           |           |            |        |           |
|-----------|-----------|------------|--------|-----------|
| 158360058 | 158361201 | intron     | 172184 | MIR595    |
| 143250247 | 143250456 | Intergenic | 172241 | LOC645166 |
| 143249613 | 143250062 | Intergenic | 172755 | LOC645166 |
| 46394126  | 46395139  | Intergenic | 174465 | ANKRD26P1 |
| 143247151 | 143247385 | Intergenic | 175324 | LOC645166 |
| 143246782 | 143247070 | Intergenic | 175666 | LOC645166 |
| 143245354 | 143245665 | Intergenic | 177083 | LOC645166 |
| 46389602  | 46391421  | Intergenic | 178586 | ANKRD26P1 |
| 143243065 | 143243369 | Intergenic | 179375 | LOC645166 |
| 46388564  | 46389383  | Intergenic | 180124 | ANKRD26P1 |
| 143241776 | 143241974 | Intergenic | 180717 | LOC645166 |
| 143241274 | 143241490 | Intergenic | 181210 | LOC645166 |
| 143240759 | 143241214 | Intergenic | 181606 | LOC645166 |
| 46386252  | 46388388  | Intergenic | 181777 | ANKRD26P1 |
| 143239403 | 143240623 | Intergenic | 182579 | LOC645166 |
| 143236947 | 143239088 | Intergenic | 184575 | LOC645166 |
| 143235974 | 143236730 | Intergenic | 186240 | LOC645166 |
| 143235636 | 143235852 | Intergenic | 186848 | LOC645166 |
| 143233453 | 143233757 | Intergenic | 188987 | LOC645166 |
| 143232262 | 143233251 | Intergenic | 189836 | LOC645166 |
| 143231131 | 143231962 | Intergenic | 191046 | LOC645166 |
| 143229977 | 143230622 | Intergenic | 192293 | LOC645166 |
| 156155501 | 156155690 | Intergenic | 192963 | LOC389602 |
| 143229315 | 143229509 | Intergenic | 193180 | LOC645166 |
| 143228415 | 143229018 | Intergenic | 193876 | LOC645166 |
| 143227363 | 143228155 | Intergenic | 194833 | LOC645166 |
| 93287268  | 93287457  | Intergenic | 194972 | MYOF      |
| 143221965 | 143223550 | Intergenic | 199835 | LOC645166 |

|           |           |            |        |           |
|-----------|-----------|------------|--------|-----------|
| 143221321 | 143221675 | Intergenic | 201094 | LOC645166 |
| 143219493 | 143221217 | Intergenic | 202237 | LOC645166 |
| 143219027 | 143219356 | Intergenic | 203401 | LOC645166 |
| 143218627 | 143218975 | Intergenic | 203791 | LOC645166 |
| 143217232 | 143218525 | Intergenic | 204714 | LOC645166 |
| 143216178 | 143217023 | Intergenic | 205992 | LOC645166 |
| 106639704 | 106639893 | Intergenic | 206174 |           |
| 143215507 | 143215984 | Intergenic | 206847 | LOC645166 |
| 143213279 | 143215406 | Intergenic | 208250 | LOC645166 |
| 143212273 | 143213161 | Intergenic | 209875 | LOC645166 |
| 143211540 | 143212216 | Intergenic | 210714 | LOC645166 |
| 143206749 | 143207243 | Intergenic | 215596 | LOC645166 |
| 143205955 | 143206675 | Intergenic | 216277 | LOC645166 |
| 143203207 | 143203543 | Intergenic | 219217 | LOC645166 |
| 143202371 | 143202909 | Intergenic | 219952 | LOC645166 |
| 143201863 | 143202052 | Intergenic | 220635 | LOC645166 |
| 143201022 | 143201251 | Intergenic | 221456 | LOC645166 |
| 143200355 | 143200931 | Intergenic | 221949 | LOC645166 |
| 143194739 | 143195856 | Intergenic | 227295 | LOC645166 |
| 143192159 | 143194519 | Intergenic | 229253 | LOC645166 |
| 143191808 | 143192056 | Intergenic | 230660 | LOC645166 |
| 143191525 | 143191734 | Intergenic | 230963 | LOC645166 |
| 143191042 | 143191260 | Intergenic | 231441 | LOC645166 |
| 143189812 | 143190856 | Intergenic | 232258 | LOC645166 |
| 143187576 | 143187881 | Intergenic | 234864 | LOC645166 |
| 2265120   | 2265473   | intron     | 235243 | ZBED1     |
| 143186762 | 143187454 | Intergenic | 235484 | LOC645166 |
| 143186254 | 143186584 | Intergenic | 236173 | LOC645166 |

|           |           |            |        |              |
|-----------|-----------|------------|--------|--------------|
| 143185725 | 143186088 | Intergenic | 236686 | LOC645166    |
| 143184522 | 143185473 | Intergenic | 237595 | LOC645166    |
| 16354547  | 16354746  | Intergenic | 238164 | CCT8L2       |
| 108617720 | 108617909 | Intergenic | 238172 | ACTL7B       |
| 16352640  | 16353026  | Intergenic | 239977 | CCT8L2       |
| 126013668 | 126013857 | Intergenic | 262153 | LOC101929116 |
| 42104298  | 42104492  | Intergenic | 263650 | LOC441666    |
| 12172125  | 12172379  | Intergenic | 274846 | LOC102723769 |
| 12176093  | 12176614  | Intergenic | 278947 | LOC102723769 |
| 12177419  | 12177621  | Intergenic | 280114 | LOC102723769 |
| 42085189  | 42085479  | Intergenic | 282711 | LOC441666    |
| 42082439  | 42082673  | Intergenic | 285489 | LOC441666    |
| 42079800  | 42080091  | Intergenic | 288100 | LOC441666    |
| 42076931  | 42077297  | Intergenic | 290931 | LOC441666    |
| 158146845 | 158147204 | intron     | 292439 | LOC100506585 |
| 42075243  | 42075569  | Intergenic | 292639 | LOC441666    |
| 42074820  | 42075009  | Intergenic | 293131 | LOC441666    |
| 42074262  | 42074626  | Intergenic | 293601 | LOC441666    |
| 49280268  | 49280695  | Intergenic | 293839 | CWH43        |
| 158148003 | 158148965 | intron     | 293899 | LOC100506585 |
| 42071118  | 42071469  | Intergenic | 296752 | LOC441666    |
| 42070557  | 42070816  | Intergenic | 297359 | LOC441666    |
| 42069365  | 42069656  | Intergenic | 298535 | LOC441666    |
| 49286324  | 49286765  | Intergenic | 299902 | CWH43        |
| 49292442  | 49292660  | Intergenic | 305909 | CWH43        |
| 49298420  | 49298815  | Intergenic | 311975 | CWH43        |
| 49304928  | 49305209  | Intergenic | 318426 | CWH43        |
| 49329595  | 49330013  | Intergenic | 343162 | CWH43        |

|           |           |            |        |              |
|-----------|-----------|------------|--------|--------------|
| 49330441  | 49330882  | Intergenic | 344019 | CWH43        |
| 41911086  | 41911275  | Intergenic | 456865 | LOC441666    |
| 41905785  | 41906110  | Intergenic | 462098 | LOC441666    |
| 41903360  | 41903672  | Intergenic | 464529 | LOC441666    |
| 41899782  | 41900060  | Intergenic | 468124 | LOC441666    |
| 26619834  | 26620200  | Intergenic | 469224 | LOC105371703 |
| 41893694  | 41894058  | Intergenic | 474169 | LOC441666    |
| 41892024  | 41892363  | Intergenic | 475852 | LOC441666    |
| 118703769 | 118703960 | Intergenic | 479160 | ANKRD7       |
| 26603734  | 26603947  | Intergenic | 485401 | LOC105371703 |
| 41879282  | 41879619  | Intergenic | 488595 | LOC441666    |
| 41876642  | 41876832  | Intergenic | 491308 | LOC441666    |
| 41875274  | 41875613  | Intergenic | 492602 | LOC441666    |
| 41874838  | 41875196  | Intergenic | 493028 | LOC441666    |
| 41874221  | 41874414  | Intergenic | 493728 | LOC441666    |
| 41873662  | 41874027  | Intergenic | 494201 | LOC441666    |
| 26594736  | 26595070  | Intergenic | 494338 | LOC105371703 |
| 93470309  | 93470839  | Intergenic | 503507 | PROS1        |
| 41859753  | 41860461  | Intergenic | 507938 | LOC441666    |
| 49635069  | 49635270  | Intergenic | 648527 | CWH43        |
| 49637637  | 49637826  | Intergenic | 651089 | CWH43        |
| 49639128  | 49639344  | Intergenic | 652594 | CWH43        |
| 49648577  | 49648860  | Intergenic | 662076 | CWH43        |
| 49651445  | 49651640  | Intergenic | 664900 | CWH43        |
| 49657460  | 49657727  | Intergenic | 670951 | CWH43        |
| 11747540  | 11747878  | Intergenic | 673881 | GYG2P1       |
| 11743745  | 11744039  | Intergenic | 677698 | GYG2P1       |
| 11734842  | 11735044  | Intergenic | 686647 | GYG2P1       |

|           |           |            |         |              |
|-----------|-----------|------------|---------|--------------|
| 11721833  | 11722195  | Intergenic | 699576  | GYG2P1       |
| 10684426  | 10684616  | Intergenic | 773723  | TTY23        |
| 49666709  | 49667012  | Intergenic | 774428  | EMB          |
| 49666039  | 49666383  | Intergenic | 775077  | EMB          |
| 49661316  | 49661707  | Intergenic | 779777  | EMB          |
| 49660827  | 49661179  | Intergenic | 780285  | EMB          |
| 49659711  | 49660081  | Intergenic | 781392  | EMB          |
| 49658946  | 49659272  | Intergenic | 782179  | EMB          |
| 49658370  | 49658868  | Intergenic | 782669  | EMB          |
| 49657590  | 49657938  | Intergenic | 783524  | EMB          |
| 49602452  | 49602898  | Intergenic | 838613  | EMB          |
| 49601387  | 49602231  | Intergenic | 839479  | EMB          |
| 10999745  | 10999944  | Intergenic | 1089046 | TTY23        |
| 11303240  | 11303480  | Intergenic | 1118230 | GYG2P1       |
| 11302164  | 11302481  | Intergenic | 1119268 | GYG2P1       |
| 11031449  | 11031759  | Intergenic | 1120806 | TTY23        |
| 25920037  | 25920378  | Intergenic | 1169034 | LOC105371703 |
| 125167064 | 125167337 | Intergenic | 3648088 | EMBP1        |
| 125167705 | 125168107 | Intergenic | 3648794 | EMBP1        |
| 125178137 | 125178539 | Intergenic | 3659226 | EMBP1        |
| 125178852 | 125180889 | Intergenic | 3660758 | EMBP1        |
| 125181396 | 125181783 | Intergenic | 3662477 | EMBP1        |
| 125182013 | 125183245 | Intergenic | 3663517 | EMBP1        |
